# Supplementary material
Source: Research Square preprint supplement (doi:10.21203/rs.3.rs-7046889/v1)
Supplement: Supplementary file 1 [file 19728b6c153a85c477a8a4bc.docx]

**Supplementary Figures**

**
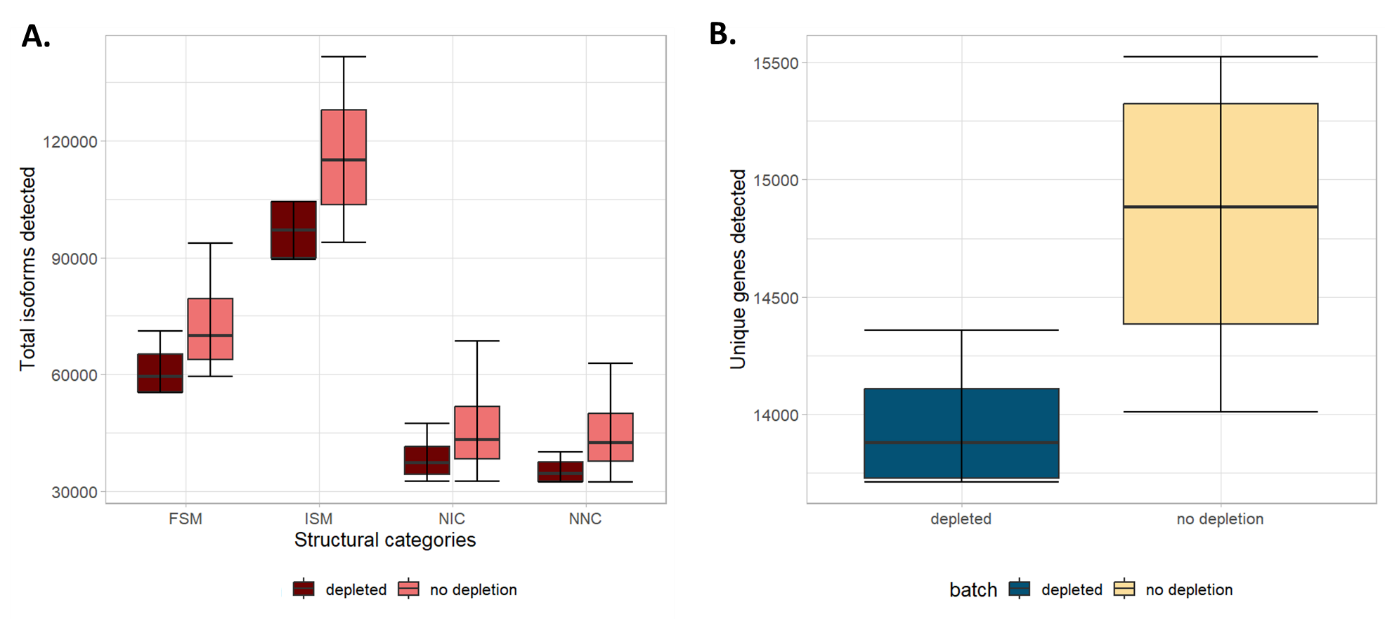
**

**Supplementary figure 1.** Detection of isoform diversity in goblin depleted (n=4) vs undepleted (n=4) samples. **A.** Total number of isoforms detected across four different structural categories. FSM: Full splice match; ISM: Incomplete splice match; NIC: Novel in catalogue; NNC: Novel not in catalogue. **B.** Number of unique genes detected in depleted samples vs undepleted. These only include full splice and incomplete splice matches. The depleted and undepleted samples are biological replicates.


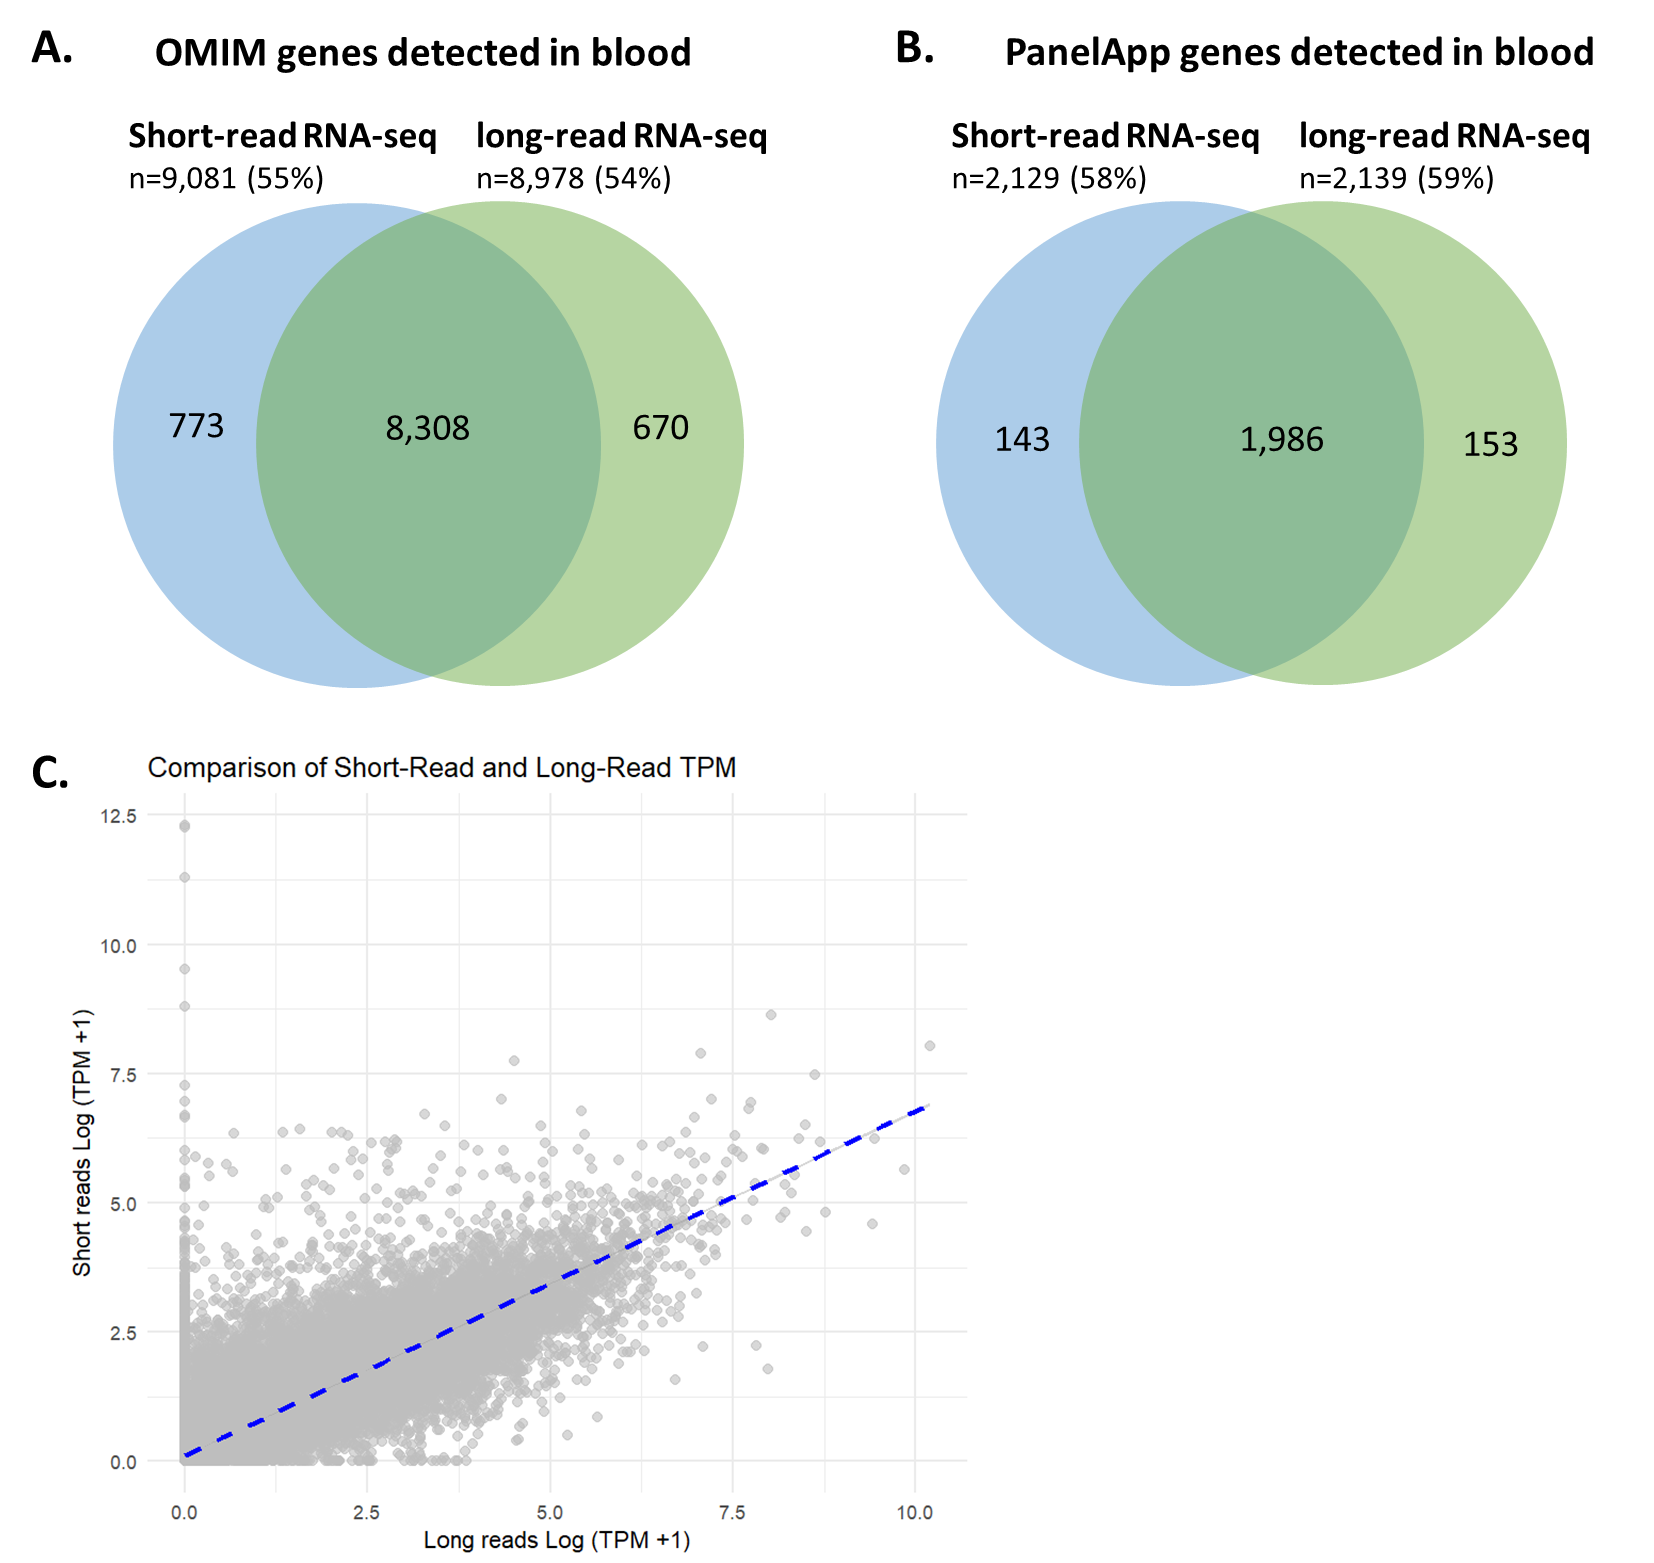


**Supplementary figure 2.** Gene detection rate in short versus long read RNA-seq in blood. **A.** Overlap of OMIM genes detected in short read RNA-seq (n =88) versus long read RNA-seq (n=4). **B.** Overlap of PanelApp genes detected in short read RNA-seq (n=88) versus long read RNA-seq (n=4). **C.** Correlation of transcripts per million (TPM) in long versus short read RNA-seq.

**
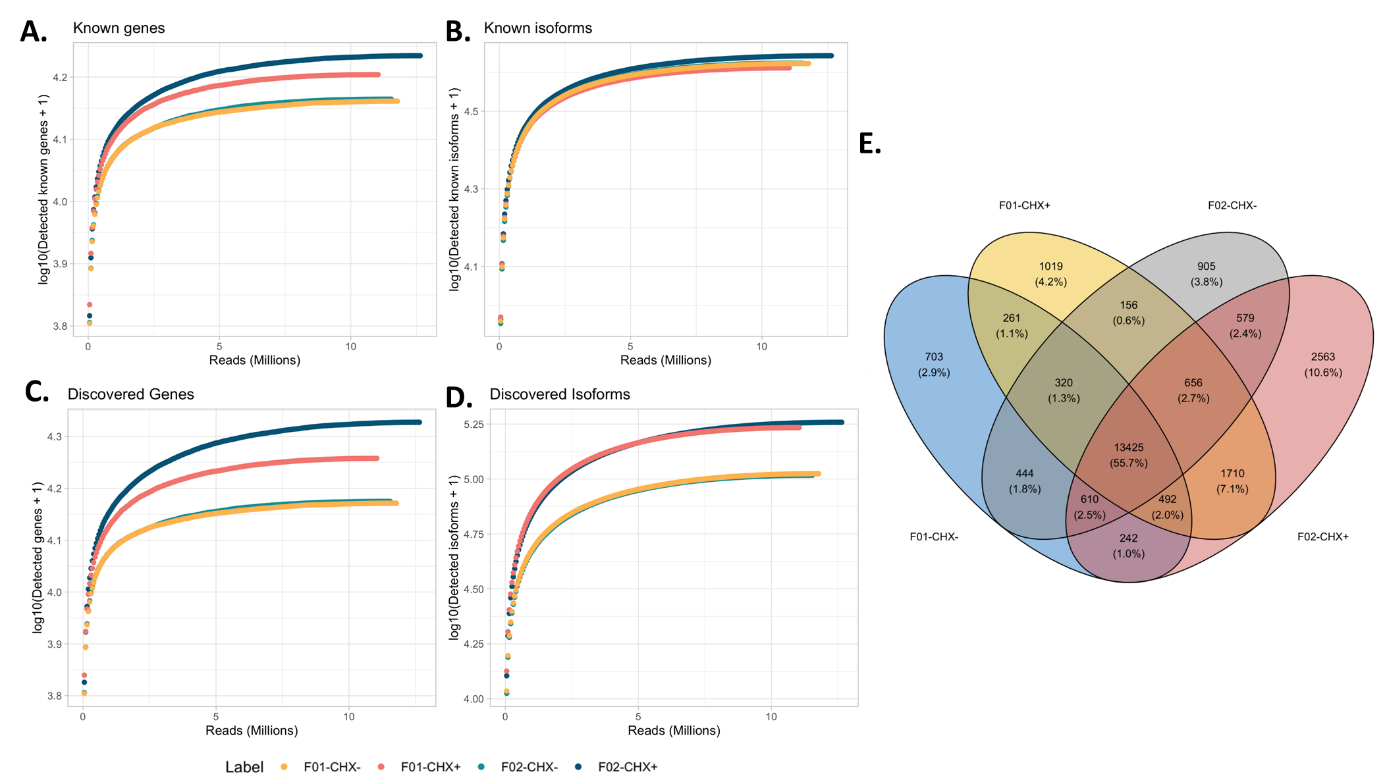
**

**Supplementary figure 3.** Gene and isoform detection rates in fibroblast cell lines. **A-B.** Saturation curves showing the number of detected genes and transcripts present in the annotation catalogue in the fibroblast cell lines at different numbers of down sampled sequencing reads. **C-D.** Saturation curves for genes and transcripts estimated from sequencing data by Iso-Seq pigeon at different numbers of down sampled sequencing reads. **E**. Venn diagram showing the overlap in expressed genes across the fibroblast lines. F01, F02 represent the two fibroblast lines; CHX- specifies lines not treated with cycloheximide, while CHX+ indicates cycloheximide-treated lines.
