# Supplementary material
Source: Research Square preprint supplement (doi:10.21203/rs.3.rs-7046889/v1)
Supplement: Supplementary file 2 [file aa7a8df61468040ed511103b.docx]

**Table 2.** Description of variants and resulting aberrant splicing events across blood cohort. Failed: sent for short read RNA-seq but failed QC rendering data unusable. ● Event picked up by this technology, ● Event picked up by this technology but low confidence (i.e < 5 reads supporting event), ○ Event not picked up by this technology.

| **sample ID** | **Gene** | **Variant(s)** | **Resulting aberrant splicing events** | **SR RNA-seq** | **LR RNA-seq** |
| --- | --- | --- | --- | --- | --- |
| P01 | *UBR4* | NM_020765.3:c.8488+3A>G | Intron 57 retention r.8488_8489ins8488+1_8489-1 p.(Ser2831ArgfsTer23) | ● | ● |
| P11 | *COL9A2* | NM_001852.4:c.1792+5G>A | Exon 30 skipping r.1604_1792del, p.(Glu535_Lys597del) | ● | ● |
| P06 | *NF2* | NM_000268.4:c.885+5G>A | Exon 9 skipping r.1604_1792del, p.(Glu535_Lys597del) | ● | ● |
| P03 | *NF1* | NM_000267.3:c.1168_1179del, p.(Asn390_His393del) | Exon 10 skipping r.1063_1185del, p.(Asp355_Lys395del) | ● | ● |
| Exon 11 skipping, r.1186_1260del, p.(Ile396_Asn420del) | ● | ○ |
| P08 | *RPS7* | NM_001011.4:c.507+3A>G | Increased intron 6 retention, r.507_508ins507+1_508-1, p.(Val170GlyfsTer15) | ● | ● |
| P10 | *PHF8* | NM_015107.3:c.784-2A>G | Exon 8 skipping r.784_946del, p.(Glu263GlyfsTer6) | ● | ○ |
| Exon 8 and exon 7 skipping r.597_946del, p.(Leu200ValfsTer23) | ● | ○ |
| P12 | *PNKP* | NM_007254.4:c.1029+2T>C | Exon 11 skipping, r.937_1029del, p.(Phe313_Pro343del) | ● | ● |
| [Intron 10 and 11 retention](mailto:S20@%20intron# retention), r.936_937ins936+1_937-1;r.1029_1030ins1029+1_1030-1 | ○ | ● |
| P13 | *WDR45B* | NM_019613.4:c.143-5T>A | Exon 3 skipping, r.142_244del, p.(Glu48Ter) | ● | ● |
| Exon 3 and 4 skipping, r.142_332del, p.(Glu48AsnfsTer10) | ○ | ● |
| P14 | *ITPR1* | NM_001378452.1:c.1712A>G | Alternative donor exon 17, r.1713_1714ins1713+1_1713+17, p.(Glu572ValfsTer9) | ● | ● |
| P16 | *EFTUD2* | NM_004247.4:c.1393A>G, p.(Met465Val) | Alternative donor exon 15, r.1393_1411del, p.(Ser466AlafsTer3) | ● | ● |
| P17 | *ZMYM2* | NM_197968.4:c.3301+5G>A | Exon 20 skipping, r.3133_3301del, p.(Gly1045LeufsTer4) | Not done | ● |
| P19 | *MLH1* | NM_000249.4:c.704A>G, p.(Asp235Gly) | Exon 9 skipping, r.678_790del, p.(Glu227SerfsTer42) | ● | ● |
| Exon 9 and 10 skipping, r.678_883del, p.(Glu227PhefsTer11) | ○ | ● |
| P21 | *LMNA* | NM_170707.4:c.1381-5G>A | Alternative acceptor intron 7, r.1380_1381ins1381-1_1381-5, p.(Asp461GlyfsTer21) | ● | ● |
| P22 | *PTEN* | NM_000314.8:c.634+3A>C | Increased exon 6 skipping; r.493_634del, p.(Gly165IlefsTer9) | ○ | ● |
| P02 | *KLHL7* | NM_001031710.3:c.936+3_936+22del | Exon 7 skipping, r.795_936del, p.(Ser265ArgfsTer26) | failed | ● |
| Intron 7 retention, r.936_937ins936+1_936-1, p.(Asp313ValTer19) | failed | ● |
| P05 | *KLHL7* | NM_001031710.3:c.936+3_936+22del | Exon 7 skipping, r.795_936del, p.(Ser265ArgfsTer26) | failed | ● |
| Intron 7 retention, r.936_937ins936+1_936-1, p.(Asp313ValTer19) | failed | ● |
| P04 | *PTEN* | NM_000314.8:c.553C>G, p.(His185Asp) | No aberrant splicing, r.= | ● | ● |
| P20 | *BAP1* | NM_004656.4:c.581G>A, p.(Gly194Glu) | No aberrant splicing, r.= | ● | ● |
| P07 | *COX7B* | NM_001866.3:c.40+5G>A | No aberrant splicing, r.= | ● | ○ |
| P09 | *PUF60* | NM_078480.3:c.560T>A, p.(Leu187*) | No aberrant splicing, r.= | ● | ● |
| P18 | *SETD5* | NM_001080517.3:c.-177+1G>A | No aberrant splicing, r.= | ● | ● |
| P15 | *KIAA0825* | NM_001145678.3:c.3451_3456+13del | Exon 18 skipping, r.3297_3456del, p.(Cys1099TrpfsTer4) | ● | ○ |
| NM_001145678.3:c.2020T>A, p.(Tyr674Asn) | No aberrant splicing, r.= | ● | ○ |
